# Supplementary material for: Genome-Wide Meta-Analysis Identifies Variants in DSCAM and PDLIM3 That Correlate with Efficacy Outcomes in Metastatic Renal Cell Carcinoma Patients Treated with Sunitinib
Source: MDPI journal article supplement (doi:10.3390/cancers14122838), 2022-06-08
Supplement: s1 [file s1]

## Eligibility criteria

### Eligibility criteria

In case a certain date is unknown, please use the following guidelines:

- In case the month and year are known: 01-mm-yyyy
- In case only the year is known: 01-01-yyyy
- In case the total date is unknown: uk

|                                                           |                                                                                                                     |
|-----------------------------------------------------------|---------------------------------------------------------------------------------------------------------------------|
| Metastasis                                                | <input type="radio"/> Yes<br><input type="radio"/> No (In case of "No" a patient can NOT be enrolled in EuroTARGET) |
| Date of diagnosis of metastasis                           | __ __ -- __ __ -- __ __ __ __                                                                                       |
| Institute of diagnosis                                    | .....<br>(For the Netherlands: according to NKR codes for hospitals)                                                |
| Date, the informed consent has been signed by the patient | __ __ -- __ __ -- __ __ __ __                                                                                       |

## General information at diagnosis

### Height

Patient's height ..... (in cm)

### Bilateral renal cell carcinoma

A patient has bilateral renal cell carcinoma, in case a second tumor in the other kidney was detected within three months. If the patient has bilateral renal cell carcinoma, it is not necessary to fill in the information for both individual tumors.

|                                                                       |                                                                                                                                                                                                                  |
|-----------------------------------------------------------------------|------------------------------------------------------------------------------------------------------------------------------------------------------------------------------------------------------------------|
| Bilateral renal cell carcinoma                                        | <input type="radio"/> Yes<br><input type="radio"/> No<br><input type="radio"/> Unknown                                                                                                                           |
| In case of bilateral renal cell carcinoma:<br>Synchronous occurrence? | <input type="radio"/> Synchronous (fill in the form using the first tumor)<br><input type="radio"/> Non-synchronous (fill in the form using the tumor with the worst prognosis)<br><input type="radio"/> Unknown |

### Tumor assessment

Multiple dates should be registered in this form.

In case a certain date is unknown, please use the following guidelines:

- In case the month and year are known: 01-mm-yyyy
- In case only the year is known: 01-01-yyyy
- In case the total date is unknown: uk

This information should be registered only once for each patient at time of recruitment.

In most cases metastasis will be diagnosed together with the primary tumor.

In case metastasis was diagnosed later, please fill in the information below on the PRIMARY TUMOR.

|                                                                    |                                                                                                                                                                                                                                                                                                                     |
|--------------------------------------------------------------------|---------------------------------------------------------------------------------------------------------------------------------------------------------------------------------------------------------------------------------------------------------------------------------------------------------------------|
| Date of initial diagnosis of primary tumor                         | __ __ -- __ __ -- __ __ __ __                                                                                                                                                                                                                                                                                       |
| Date of surgery / biopsy for primary tumor                         | __ __ -- __ __ -- __ __ __ __                                                                                                                                                                                                                                                                                       |
| Tumor sample on which the pathology diagnosis was based comes from | <input type="radio"/> Primary tumor<br><input type="radio"/> Metastasis<br><input type="radio"/> No pathology diagnosis                                                                                                                                                                                             |
| Pathology laboratorium of diagnosis                                | .....<br>(For the Netherlands: according to NKR codes for hospitals)                                                                                                                                                                                                                                                |
| Pathology identification number of specimen                        | .....                                                                                                                                                                                                                                                                                                               |
| Type of renal cell cancer                                          | <input type="radio"/> Clear renal cell carcinoma<br><input type="radio"/> Chromophobe renal cell carcinoma<br><input type="radio"/> Collecting duct carcinoma<br><input type="radio"/> Papillary renal cell carcinoma<br><input type="radio"/> Non-clear cell renal cell carcinoma<br><input type="radio"/> Unknown |
| Papillary type                                                     | <input type="radio"/> Papillary type I RCC<br><input type="radio"/> Papillary type II RCC<br><input type="radio"/> Unknown                                                                                                                                                                                          |
| Please specify non-clear cell renal cell carcinoma                 | .....                                                                                                                                                                                                                                                                                                               |

|                                  |                                                                                                                                                                       |
|----------------------------------|-----------------------------------------------------------------------------------------------------------------------------------------------------------------------|
| Presence of sarcomatoid elements | <input type="radio"/> Yes<br><input type="radio"/> No<br><input type="radio"/> Unknown                                                                                |
| Fuhrman grade                    | <input type="radio"/> Grade I<br><input type="radio"/> Grade II<br><input type="radio"/> Grade III<br><input type="radio"/> Grade IV<br><input type="radio"/> Unknown |
| Presence of tumor necrosis       | <input type="radio"/> Yes<br><input type="radio"/> No<br><input type="radio"/> Unknown                                                                                |

#### cTNM classification

According to TNM staging system 7 (2009), based on clinical information. For instructions, please see header row.

#### TNM staging system - clinical

Indicate the TNM stage according to the TNM classification 7 (2009) from clinical information. In case a previous edition of the TNM staging system was used, re-evaluate the TNM stage according to this new edition (2009).

#### Summary of the changes in the TNM classification 7 (2009)

T2 has been subdivided in:

T2a - Tumor more than 7 cm but not more than 10 cm

T2b - Tumor more than 10 cm, limited to the kidney

T3 and T4 got changes concerning the text:

T3a - Invasion into the adrenal gland is removed from this stage (now T4)

T4 - Tumor invades beyond Gerota fascia (including contiguous extension into ipsilateral adrenal gland)

|                          |                                                                                                                                            |                                                                                    |                                                                                                                                             |
|--------------------------|--------------------------------------------------------------------------------------------------------------------------------------------|------------------------------------------------------------------------------------|---------------------------------------------------------------------------------------------------------------------------------------------|
| cT- Primary Tumor        | <input type="radio"/> TX<br><input type="radio"/> T0<br><input type="radio"/> T1<br><input type="radio"/> T1a<br><input type="radio"/> T1b | <input type="radio"/> T2<br><input type="radio"/> T2a<br><input type="radio"/> T2b | <input type="radio"/> T3<br><input type="radio"/> T3a<br><input type="radio"/> T3b<br><input type="radio"/> T3c<br><input type="radio"/> T4 |
| cN- Regional Lymph Nodes | <input type="radio"/> NX<br><input type="radio"/> N0<br><input type="radio"/> N1<br><input type="radio"/> N2                               |                                                                                    |                                                                                                                                             |
| cM- Distant              | <input type="radio"/> M0<br><input type="radio"/> M1                                                                                       |                                                                                    |                                                                                                                                             |

#### pTNM classification

According to TNM staging system 7 (2009), based on pathology. For instructions, please see the header row.

#### TNM staging system - pathology

Indicate the TNM stage according to the TNM classification 7 (2009) from the pathology report. In case a previous edition of the TNM staging system was used, re-evaluate the TNM stage according to this new edition (2009). In case a patient did not get surgery the pTNM cannot be assessed, since no pathological grading took place. In this case, indicate the TNM classification based on clinical information.

#### Summary of the changes in the TNM classification 7 (2009)

T2 has been subdivided in:

T2a - Tumor more than 7 cm but not more than 10 cm

T2b - Tumor more than 10 cm, limited to the kidney

T3 and T4 got changes concerning the text:

T3a - Invasion into the adrenal gland is removed from this stage (now T4)

T4 - Tumor invades beyond Gerota fascia (including contiguous extension into ipsilateral adrenal gland)

|                          |                                                                                                                                            |                                                                                    |                                                                                                                                             |
|--------------------------|--------------------------------------------------------------------------------------------------------------------------------------------|------------------------------------------------------------------------------------|---------------------------------------------------------------------------------------------------------------------------------------------|
| pT- Primary Tumor        | <input type="radio"/> TX<br><input type="radio"/> T0<br><input type="radio"/> T1<br><input type="radio"/> T1a<br><input type="radio"/> T1b | <input type="radio"/> T2<br><input type="radio"/> T2a<br><input type="radio"/> T2b | <input type="radio"/> T3<br><input type="radio"/> T3a<br><input type="radio"/> T3b<br><input type="radio"/> T3c<br><input type="radio"/> T4 |
| pN- Regional Lymph Nodes | <input type="radio"/> NX<br><input type="radio"/> N0<br><input type="radio"/> N1<br><input type="radio"/> N2                               |                                                                                    |                                                                                                                                             |
| pM- Distant              | <input type="radio"/> M0<br><input type="radio"/> M1                                                                                       |                                                                                    |                                                                                                                                             |
|                          | <input type="radio"/> pTNM classification not done                                                                                         |                                                                                    |                                                                                                                                             |

#### Co-morbidities at start treatment of metastasis

If co-morbidities exist at the time of start of treatment of metastasis, these co-morbidities should be registered here. A co-morbidity is NOT related to the cancer-specific treatment, and NOT related to the disease itself.

|                                                                                                                                                                                                                                                                                                                                                                                                                                                                                                                                                                                                                                                                                                                                                                                                                                                                                                                                                                                                              |                                                                                                                                            |
|--------------------------------------------------------------------------------------------------------------------------------------------------------------------------------------------------------------------------------------------------------------------------------------------------------------------------------------------------------------------------------------------------------------------------------------------------------------------------------------------------------------------------------------------------------------------------------------------------------------------------------------------------------------------------------------------------------------------------------------------------------------------------------------------------------------------------------------------------------------------------------------------------------------------------------------------------------------------------------------------------------------|--------------------------------------------------------------------------------------------------------------------------------------------|
| Other malignancy<br>excl. non-melanoma skin cancer<br>and carcinoma in situ of the cervix uteri                                                                                                                                                                                                                                                                                                                                                                                                                                                                                                                                                                                                                                                                                                                                                                                                                                                                                                              | <input type="radio"/> No<br><input type="radio"/> Yes, please specify .....<br><input type="radio"/> Unknown                               |
| Diabetes mellitus                                                                                                                                                                                                                                                                                                                                                                                                                                                                                                                                                                                                                                                                                                                                                                                                                                                                                                                                                                                            | <input type="radio"/> No<br><input type="radio"/> Yes<br><input type="radio"/> Unknown                                                     |
| Hypertension                                                                                                                                                                                                                                                                                                                                                                                                                                                                                                                                                                                                                                                                                                                                                                                                                                                                                                                                                                                                 | <input type="radio"/> No<br><input type="radio"/> Yes<br><input type="radio"/> Unknown                                                     |
| in case of "yes", currently treated<br>with medication?                                                                                                                                                                                                                                                                                                                                                                                                                                                                                                                                                                                                                                                                                                                                                                                                                                                                                                                                                      | <input type="radio"/> No<br><input type="radio"/> Yes<br><input type="radio"/> Unknown                                                     |
| Cardiovascular disease<br>e.g. Intermittent claudication, bifurcation<br>prosthesis, percutaneous transluminal<br>angioplasty (PTA), tube prosthesis,                                                                                                                                                                                                                                                                                                                                                                                                                                                                                                                                                                                                                                                                                                                                                                                                                                                        | <input type="radio"/> No<br><input type="radio"/> Yes, please specify .....<br><input type="radio"/> Unknown                               |
| abdominal aortic aneurysm, aortic aneurysm, generalized atherosclerosis, peripheral vascular disease,<br>embolectomy, post myocardial infarction, myocardial infarction, angina pectoris, coronary artery bypass graft<br>(CABG), coronary heart disease, percutaneous transluminal coronary angioplasty (PTCA), heart failure,<br>cardiomyopathy, cerebrovascular accident (CVA) in history (not a transient ischemic attack (TIA), cerebral<br>artery disease, cerebral hemorrhage, post carotid endarterectomy, heartvalve prosthesis (aortic valve<br>prosthesis, mitral valve prosthesis), valvular heart disease (mitral, tricuspid, aortic or pulmonary valve stenosis<br>or regurgitation), post heart transplantation, thrombosis, pulmonary embolism, pelvic vein thrombosis,<br>arrhythmias, atrial fibrillation, ventricular fibrillation, AV-block, artificial pacemaker, cardioversion.<br>Although DVT actually falls in this category, we would like to have a separate registration of DVT. |                                                                                                                                            |
| Deep vein thrombosis<br>Although DVT actually falls in category<br>"cardiovascular diseases", we would<br>like to have a separate registration of<br>DVT.                                                                                                                                                                                                                                                                                                                                                                                                                                                                                                                                                                                                                                                                                                                                                                                                                                                    | <input type="radio"/> No<br><input type="radio"/> Yes, most recent year of diagnosis ____ -- ____ -- ____<br><input type="radio"/> Unknown |
| Other clotting disorder<br>e.g. haemophilia                                                                                                                                                                                                                                                                                                                                                                                                                                                                                                                                                                                                                                                                                                                                                                                                                                                                                                                                                                  | <input type="radio"/> No<br><input type="radio"/> Yes, please specify .....<br><input type="radio"/> Unknown                               |

|                                                                                                                                                                                                                                                    |                                                                                                              |
|----------------------------------------------------------------------------------------------------------------------------------------------------------------------------------------------------------------------------------------------------|--------------------------------------------------------------------------------------------------------------|
| <p>Lung disease<br/> e.g. CARA, emphysema, chronic<br/> bronchitis, chronic obstructive<br/> pulmonary disease, obstructive</p>                                                                                                                    | <input type="radio"/> No<br><input type="radio"/> Yes, please specify .....<br><input type="radio"/> Unknown |
| <p>pulmonary disease, bronchial hyperreactivity, pulmonary fibrosis, post-lung transplantation.</p>                                                                                                                                                |                                                                                                              |
| <p>Gastro intestinal<br/> e.g. peptic ulcer, gastric ulcer, duodenal<br/> ulcer, (reflux) esophagitis, post<br/> gastrectomy, total or partial (B1, B2-</p>                                                                                        | <input type="radio"/> No<br><input type="radio"/> Yes, please specify .....<br><input type="radio"/> Unknown |
| <p>resection), inflammatory bowel disease (Morbis Crohn, CU (Colitis Ulcerosa) (no familial adenomatosis<br/> polyposis), liver disease (e.g. cirrhosis, hepatitis A, B, C, non-A and non-B), post liver transplantation,<br/> diverticulitis.</p> |                                                                                                              |
| <p>Urinary tract and genital organs<br/> e.g. chron. glomerulonephritis (CGN),<br/> chron. pyelonephritis (CPN), chronic<br/> renal failure, nephrotic syndrome, post</p>                                                                          | <input type="radio"/> No<br><input type="radio"/> Yes, please specify .....<br><input type="radio"/> Unknown |
| <p>kidney transplantation, dialysis (haemodialysis, CIPD, peritoneal dialysis).</p>                                                                                                                                                                |                                                                                                              |
| <p>Muscles, joints and connective tissue<br/> e.g. connective tissue diseases (e.g.,<br/> Sarcoidosis = M. Besnier Boeck,<br/> Wegener, periarteriitis nodosa (PAN),</p>                                                                           | <input type="radio"/> No<br><input type="radio"/> Yes, please specify .....<br><input type="radio"/> Unknown |
| <p>Systemic lupus erythematosus (SLE), rheumatoid arthritis (RA)</p>                                                                                                                                                                               |                                                                                                              |
| <p>Central and peripheral NS<br/> e.g. dementia, Alzheimer's disease,<br/> dementia syndrome, hemiplegic,<br/> hemiparesis, quadriplegic, paraplegic,</p>                                                                                          | <input type="radio"/> No<br><input type="radio"/> Yes, please specify .....<br><input type="radio"/> Unknown |
| <p>psychiatric disorders (this refers to severe chronic psychiatric problems, e.g. hospitalized in a psychiatric<br/> hospital or ward, severe depression, psychosis or schizophrenia), Parkinson's disease.</p>                                   |                                                                                                              |
| <p>Metabolic disease<br/> e.g. haemophilia,<br/> hypo-/hyperthyreoidia</p>                                                                                                                                                                         | <input type="radio"/> No<br><input type="radio"/> Yes, please specify .....<br><input type="radio"/> Unknown |
| <p>Infectious disease<br/> Only chronic infectious diseases, e.g.<br/> HIV-positive, AIDS, tuberculosis. No<br/> acute infectious diseases, e.g.<br/> pneumonia.</p>                                                                               | <input type="radio"/> No<br><input type="radio"/> Yes, please specify .....<br><input type="radio"/> Unknown |
| <p>Congenital disorder<br/> e.g. Down syndrome, clubfoot, facial<br/> clefts, 18q syndrome, sickle cell disease</p>                                                                                                                                | <input type="radio"/> No<br><input type="radio"/> Yes, please specify .....<br><input type="radio"/> Unknown |
| <p>Other disorder</p>                                                                                                                                                                                                                              | <input type="radio"/> No<br><input type="radio"/> Yes, please specify .....<br><input type="radio"/> Unknown |

Available patient material

### Blood sample

In case a certain date is unknown, please use the following guidelines:

- In case the month and year are known: 01-mm-yyyy
- In case only the year is known: 01-01-yyyy
- In case the total date is unknown: uk

Blood sample

☐ Yes

date of venepuncture    \_\_ \_\_ -- \_\_ \_\_ -- \_\_ \_\_ \_\_ \_\_

☐ No

### Frozen tumor sample

Frozen tumor sample available for EuroTARGET

☐ Yes

☐ No

Available tumor material

☐ Primary tumor

☐ Metastasis

☐ Primary tumor and metastasis

### Paraffin-embedded tumor sample

Paraffin-embedded tumor sample available for EuroTARGET

☐ Yes

☐ No

Available tumor material

☐ Primary tumor

☐ Metastasis

☐ Primary tumor and metastasis

## Treatment line

### Treatment of metastasis

Information collected during treatment regimes for metastasis.

When another drug is administered a new treatment line starts.

Please use one form per treatment line!

"1st line treatment of metastasis" should always be filled in. 2nd, 3rd, 4th and 5th treatment lines should only be filled in in case of (multiple) medication change(s).

Multiple dates should be registered in this form. In case a certain date is unknown, please use the following guidelines:

- In case the month and year are known: 01-mm-yyyy
- In case only the year is known: 01-01-yyyy
- In case the total date is unknown: uk

Treatment line no

- ☐ 1 or palliative care or best supportive care  
☐ 2  
☐ 3  
☐ 4  
☐ 5

### Clinical data at start of treatment of metastasis

In which hospital is this treatment line administered

.....  
(For the Netherlands: according to NKR codes for hospitals)

Weight of the patient

..... (in kg)

WHO performance status

Register the WHO performance status. Copy exactly what is written in the medical record. Do not interpret the performance status yourself. When the WHO performance status cannot be found, but the Karnofsky score is available, the WHO performance status can be derived from the Karnofsky score.

- ☐ 0. Fully active, able to carry on all predisease activities without restrictions  
☐ 1. Restricted in physically strenuous activity but ambulatory and able to carry out work of a light or sedentary nature  
☐ 2. Ambulatory and capable of all self care but unable to carry out any \ work activities. Up and about more than 50 percent of waking hours  
☐ 3. Capable of only limited self-care, confined to bed or chair for 50 percent or more of waking hours  
☐ 4. Completely disabled. Cannot carry on any self-care. Totally confined to bed or chair  
☐ Unknown

WHO Karnofsky score

0 100  
 0 90  
 1 80  
 1 70  
 2 60  
 2 50  
 3 40  
 3 30  
 4 20  
 4 10  
 4 0

Description

Normal no complaints, no evidence of disease.  
 Able to carry on normal activity; minor signs or symptoms of disease.  
 Normal activity with effort; some signs or symptoms of disease.  
 Cares for self; unable to carry on normal activity or to do active work.  
 Requires occasional assistance, but is able to care for most of his personal needs.  
 Requires considerable assistance and frequent medical care.  
 Disabled; requires special care and assistance.  
 Severely disabled; hospital admission is indicated although death not imminent.  
 Very sick; hospital admission necessary; active supportive treatment necessary.  
 Moribund; fatal processes progressing rapidly.  
 Dead

### Number of locations with metastases

Number of locations with metastases ☐ 1  
 Indicate the number of locations (number of sites) with metastases at the start of this treatment line. Also include lymph node metastases. Regional and distant lymph node metastases count as one site. ☐ 2  
☐ 3  
☐ 4  
☐ > 4

### Location of metastases

Location of metastases ☐ Lung  
☐ Lymph nodes (regional and/or distant)  
☐ Liver  
☐ Bone  
☐ Brain  
☐ Adrenal gland  
☐ Other, please specify .....

### Lab values at start of treatment of metastasis

Enter the lab values at the start of this treatment line. Values must not be older than 3 months before start treatment. When necessary, the characters < or > can be used in the fields below.

|                                              |       |                                                             |                                  |
|----------------------------------------------|-------|-------------------------------------------------------------|----------------------------------|
| Hemoglobin                                   | ..... | <input type="radio"/> mmol/L<br><input type="radio"/> g/dl  | (calculated to 1 decimal place)  |
| Leukocytes                                   | ..... | x 10 <sup>9</sup> /L (=10 <sup>3</sup> /μl)                 | (calculated to 1 decimal place)  |
| Percentage of neutrophils                    | ..... | %                                                           | (calculated to 1 decimal place)  |
| Number of neutrophils                        | ..... | x 10 <sup>9</sup> /L                                        | (calculated to 2 decimal places) |
| Trombocytes (platelets)                      | ..... | x 10 <sup>9</sup> /L (=10 <sup>3</sup> /μl)                 |                                  |
| Creatinine                                   | ..... | <input type="radio"/> μmol/L<br><input type="radio"/> mg/dl | (calculated to 1 decimal place)  |
| Albumin                                      | ..... | g/L                                                         |                                  |
| Calcium                                      | ..... | <input type="radio"/> mmol/L                                | (calculated to 2 decimal places) |
| Total bilirubin                              | ..... | <input type="radio"/> μmol/L<br><input type="radio"/> mg/dl | (calculated to 1 decimal place)  |
| Alkaline phosphatase                         | ..... | U/L                                                         |                                  |
| Aspartate aminotransferase (SGOT/ AST/ ASAT) | ..... | U/L                                                         |                                  |
| Alanine transaminase (SGPT/GUID/ALT/ALAT)    | ..... | U/L                                                         |                                  |
| LDH                                          | ..... | units/L                                                     |                                  |



## Drug treatment

- Which drug(s) is/are being used
- ☐ None, palliative or best supportive care
  - ☐ Interferon-alpha (IFN-a)
  - ☐ Interferon-alpha (IFN-a) + vinblastine
  - ☐ Interleukin 2
  - ☐ Sunitinib
  - ☐ Sorafenib
  - ☐ Bevacizumab + Interferon-alpha (IFN-a)
  - ☐ Temsirolimus
  - ☐ Everolimus
  - ☐ Pazopanib
  - ☐ Other, please specify .....
  - ☐ Unknown

## Dosing schemes

Please specify dose, frequency etc. in detail below.

A treatment line can consist of different cycles. This is the case for the treatment with Sunitinib. Usually Sunitinib is given during four weeks (weeks on), followed by a two-week rest-period (weeks off). This six-week period is equal to one cycle.

One dosing scheme is a (number of ) treatment cycle(s). In case the treatment cycle has been changed (e.g. in case of dose reduction, change in frequency etc.), please fill in the new treatment cycle in dosing scheme 2, 3, etc. You can add extra schemes by clicking on the + button.

A treatment line can also consist of a treatment given during a certain number of weeks/ months. No cycles are involved. This is the case for the treatment with Interferon-alpha, Sorafenib, Everolimus, Pazopanib, Bevacizumab (+ interferon alpha) and Temsirolimus. Use "n/a" in the "weeks on", "weeks off", "total amount per cycle" and "no of cycles with this scheme" fields.

A treatment may consist of a combination of drugs (e.g. Bevacizumab + Interferon alpha). If this is the case, use two schemes for registering this treatment.

In case a new treatment line has started (change of medication), use a new therapy form ("2nd, 3rd, 4th, 5th line treatment of metastasis") for registering this line.

|    |                          |                                                                                                                                                                                                                                                     |                                 |                                                                                                                                                                                                                                                                                                                                                                                                |
|----|--------------------------|-----------------------------------------------------------------------------------------------------------------------------------------------------------------------------------------------------------------------------------------------------|---------------------------------|------------------------------------------------------------------------------------------------------------------------------------------------------------------------------------------------------------------------------------------------------------------------------------------------------------------------------------------------------------------------------------------------|
| 1. | Start Date 1             | __ __ -- __ __ -- __ __ __ __                                                                                                                                                                                                                       |                                 |                                                                                                                                                                                                                                                                                                                                                                                                |
|    | Dose 1                   | ..... <input type="radio"/> mg (calculated to 2 decimal places)<br><input type="radio"/> million IU<br><input type="radio"/> ml<br><input type="radio"/> mmol<br><input type="radio"/> other, please specify .....<br><input type="radio"/> unknown |                                 |                                                                                                                                                                                                                                                                                                                                                                                                |
|    | Frequency 1              | <input type="radio"/> 0.5 x<br><input type="radio"/> 1 x<br><input type="radio"/> 2 x<br><input type="radio"/> 3 x<br><input type="radio"/> unknown                                                                                                 | per 1                           | <input type="radio"/> day<br><input type="radio"/> 3 days<br><input type="radio"/> week<br><input type="radio"/> month<br><input type="radio"/> unknown                                                                                                                                                                                                                                        |
|    | Weeks on treatment 1     | .....                                                                                                                                                                                                                                               | Weeks off treatment 1           | ..... In case no cycles are involved (eg., interferon alpha) use <b>n/a</b> .                                                                                                                                                                                                                                                                                                                  |
|    | Total amount per cycle 1 | .....                                                                                                                                                                                                                                               | No of cycles with this scheme 1 | ..... Please use the unit chosen above. In case no cycles are involved (eg., interferon alpha) use <b>n/a</b> .                                                                                                                                                                                                                                                                                |
|    | Stop date 1              | __ __ -- __ __ -- __ __ __ __                                                                                                                                                                                                                       |                                 | Reason for stop/change 1<br><input type="radio"/> toxicity grade 1 or 2<br><input type="radio"/> toxicity grade 3 or 4<br><input type="radio"/> progression / relapse<br><input type="radio"/> condition of patient<br><input type="radio"/> wishes of patient<br><input type="radio"/> patient has died<br><input type="radio"/> other, please specify .....<br><input type="radio"/> unknown |

|    |                          |                                                                                                                                                                                                                                                     |                                 |                                                                                                                                                                                                                                                                                                                                                                                                |
|----|--------------------------|-----------------------------------------------------------------------------------------------------------------------------------------------------------------------------------------------------------------------------------------------------|---------------------------------|------------------------------------------------------------------------------------------------------------------------------------------------------------------------------------------------------------------------------------------------------------------------------------------------------------------------------------------------------------------------------------------------|
| 2. | Start Date 2             | __ __ -- __ __ -- __ __ __ __                                                                                                                                                                                                                       |                                 |                                                                                                                                                                                                                                                                                                                                                                                                |
|    | Dose 2                   | ..... <input type="radio"/> mg (calculated to 2 decimal places)<br><input type="radio"/> million IU<br><input type="radio"/> ml<br><input type="radio"/> mmol<br><input type="radio"/> other, please specify .....<br><input type="radio"/> unknown |                                 |                                                                                                                                                                                                                                                                                                                                                                                                |
|    | Frequency 2              | <input type="radio"/> 0.5 x<br><input type="radio"/> 1 x<br><input type="radio"/> 2 x<br><input type="radio"/> 3 x<br><input type="radio"/> unknown                                                                                                 | per 2                           | <input type="radio"/> day<br><input type="radio"/> 3 days<br><input type="radio"/> week<br><input type="radio"/> month<br><input type="radio"/> unknown                                                                                                                                                                                                                                        |
|    | Weeks on treatment 2     | .....                                                                                                                                                                                                                                               | Weeks off treatment 2           | ..... In case no cycles are involved (eg., interferon alpha) use <b>n/a</b> .                                                                                                                                                                                                                                                                                                                  |
|    | Total amount per cycle 2 | .....                                                                                                                                                                                                                                               | No of cycles with this scheme 2 | ..... Please use the unit chosen above. In case no cycles are involved (eg., interferon alpha) use <b>n/a</b> .                                                                                                                                                                                                                                                                                |
|    | Stop date 2              | __ __ -- __ __ -- __ __ __ __                                                                                                                                                                                                                       |                                 | Reason for stop/change 2<br><input type="radio"/> toxicity grade 1 or 2<br><input type="radio"/> toxicity grade 3 or 4<br><input type="radio"/> progression / relapse<br><input type="radio"/> condition of patient<br><input type="radio"/> wishes of patient<br><input type="radio"/> patient has died<br><input type="radio"/> other, please specify .....<br><input type="radio"/> unknown |

|    |                          |                                                                                                                                                                                                                                                     |                                 |                                                                                                                                                                                                                                                                                                                                                                    |
|----|--------------------------|-----------------------------------------------------------------------------------------------------------------------------------------------------------------------------------------------------------------------------------------------------|---------------------------------|--------------------------------------------------------------------------------------------------------------------------------------------------------------------------------------------------------------------------------------------------------------------------------------------------------------------------------------------------------------------|
| 3. | Start Date 3             | ____ -- ____ -- ____                                                                                                                                                                                                                                |                                 |                                                                                                                                                                                                                                                                                                                                                                    |
|    | Dose 3                   | ..... <input type="radio"/> mg (calculated to 2 decimal places)<br><input type="radio"/> million IU<br><input type="radio"/> ml<br><input type="radio"/> mmol<br><input type="radio"/> other, please specify .....<br><input type="radio"/> unknown |                                 |                                                                                                                                                                                                                                                                                                                                                                    |
|    | Frequency 3              | <input type="radio"/> 0.5 x<br><input type="radio"/> 1 x<br><input type="radio"/> 2 x<br><input type="radio"/> 3 x<br><input type="radio"/> unknown                                                                                                 | per 3                           | <input type="radio"/> day<br><input type="radio"/> 3 days<br><input type="radio"/> week<br><input type="radio"/> month<br><input type="radio"/> unknown                                                                                                                                                                                                            |
|    | Weeks on treatment 3     |                                                                                                                                                                                                                                                     | Weeks off treatment 3           | ..... In case no cycles are involved (eg., interferon alpha) use <b>n/a</b> .                                                                                                                                                                                                                                                                                      |
|    | Total amount per cycle 3 | .....                                                                                                                                                                                                                                               | No of cycles with this scheme 3 | ..... Please use the unit chosen above. In case no cycles are involved (eg., interferon alpha) use <b>n/a</b> .                                                                                                                                                                                                                                                    |
|    | Stop date 3              | ____ -- ____ -- ____                                                                                                                                                                                                                                | Reason for stop/change 3        | <input type="radio"/> toxicity grade 1 or 2<br><input type="radio"/> toxicity grade 3 or 4<br><input type="radio"/> progression / relapse<br><input type="radio"/> condition of patient<br><input type="radio"/> wishes of patient<br><input type="radio"/> patient has died<br><input type="radio"/> other, please specify .....<br><input type="radio"/> unknown |

  

|    |                          |                                                                                                                                                                                                                                                     |                                 |                                                                                                                                                                                                                                                                                                                                                                    |
|----|--------------------------|-----------------------------------------------------------------------------------------------------------------------------------------------------------------------------------------------------------------------------------------------------|---------------------------------|--------------------------------------------------------------------------------------------------------------------------------------------------------------------------------------------------------------------------------------------------------------------------------------------------------------------------------------------------------------------|
| 4. | Start Date 4             | ____ -- ____ -- ____                                                                                                                                                                                                                                |                                 |                                                                                                                                                                                                                                                                                                                                                                    |
|    | Dose 4                   | ..... <input type="radio"/> mg (calculated to 2 decimal places)<br><input type="radio"/> million IU<br><input type="radio"/> ml<br><input type="radio"/> mmol<br><input type="radio"/> other, please specify .....<br><input type="radio"/> unknown |                                 |                                                                                                                                                                                                                                                                                                                                                                    |
|    | Frequency 4              | <input type="radio"/> 0.5 x<br><input type="radio"/> 1 x<br><input type="radio"/> 2 x<br><input type="radio"/> 3 x<br><input type="radio"/> unknown                                                                                                 | per 4                           | <input type="radio"/> day<br><input type="radio"/> 3 days<br><input type="radio"/> week<br><input type="radio"/> month<br><input type="radio"/> unknown                                                                                                                                                                                                            |
|    | Weeks on treatment 4     |                                                                                                                                                                                                                                                     | Weeks off treatment 4           | ..... In case no cycles are involved (eg., interferon alpha) use <b>n/a</b> .                                                                                                                                                                                                                                                                                      |
|    | Total amount per cycle 4 | .....                                                                                                                                                                                                                                               | No of cycles with this scheme 4 | ..... Please use the unit chosen above. In case no cycles are involved (eg., interferon alpha) use <b>n/a</b> .                                                                                                                                                                                                                                                    |
|    | Stop date 4              | ____ -- ____ -- ____                                                                                                                                                                                                                                | Reason for stop/change 4        | <input type="radio"/> toxicity grade 1 or 2<br><input type="radio"/> toxicity grade 3 or 4<br><input type="radio"/> progression / relapse<br><input type="radio"/> condition of patient<br><input type="radio"/> wishes of patient<br><input type="radio"/> patient has died<br><input type="radio"/> other, please specify .....<br><input type="radio"/> unknown |

(Concomitant) non drug treatment - Surgery

|                 |                                                                                                                                                                                                                                                                                                                                                                                                                                                                                                                                                                                                                                                                                                                                                                                                                                                                                           |
|-----------------|-------------------------------------------------------------------------------------------------------------------------------------------------------------------------------------------------------------------------------------------------------------------------------------------------------------------------------------------------------------------------------------------------------------------------------------------------------------------------------------------------------------------------------------------------------------------------------------------------------------------------------------------------------------------------------------------------------------------------------------------------------------------------------------------------------------------------------------------------------------------------------------------|
|                 | <input type="radio"/> No surgery                                                                                                                                                                                                                                                                                                                                                                                                                                                                                                                                                                                                                                                                                                                                                                                                                                                          |
| Date of surgery | __ __ -- __ __ -- __ __ __ __                                                                                                                                                                                                                                                                                                                                                                                                                                                                                                                                                                                                                                                                                                                                                                                                                                                             |
| Surgery type    | <input type="radio"/> Open nephrectomy<br><input type="radio"/> Laparoscopic nephrectomy<br><input type="radio"/> Open partial nephrectomy<br><input type="radio"/> Laparoscopic partial nephrectomy<br><input type="radio"/> Adrenalectomy<br><input type="radio"/> Lymphadenectomy<br><input type="radio"/> Thrombectomy<br><input type="radio"/> Embolisation<br><input type="radio"/> Radio Frequency Ablation (RFA)<br><input type="radio"/> Cryosurgery<br><input type="radio"/> Metastasectomy<br><input type="radio"/> Nephrectomy + metastasectomy (in one session)<br><input type="radio"/> Partial nephrectomy + metastasectomy (in one session)<br><input type="radio"/> Nephrectomy + other (in one session)<br><input type="radio"/> Partial nephrectomy + other (in one session)<br><br><input type="radio"/> Other, please specify .....<br><input type="radio"/> Unknown |

(Concomitant) non drug treatment - Radiotherapy

|                                                   |                                                                                        |
|---------------------------------------------------|----------------------------------------------------------------------------------------|
|                                                   | <input type="radio"/> No radiotherapy                                                  |
| Start date                                        | __ __ -- __ __ -- __ __ __ __                                                          |
| Stop date                                         | __ __ -- __ __ -- __ __ __ __                                                          |
| Total dose                                        | ..... Gy.                                                                              |
| Site of radiotherapy                              | .....                                                                                  |
| Subjective (symptomatic) response to radiotherapy | <input type="radio"/> No<br><input type="radio"/> Yes<br><input type="radio"/> Unknown |

## Toxicities

The items in this table must be updated on an ongoing basis.

Please collect only adverse events which are (likely) CAUSALLY related to the treatment.

All grade 3, 4 and 5 toxicities (NOT grade 1 and 2) developed until one month after the last treatment should be reported. Register per treatment line each toxicity only once, with the highest CTC grade reached. If a toxicity existed before the diagnosis of renal cell carcinoma was made, but the CTC grade has increased after diagnosis, this toxicity must also be reported. In this case the starting date is the day that the toxicity worsens.

If the CTC grade was not specified by the physician in the medical record of the patient, specify the grade of each specific toxicity yourself according to CTCAE version 4.0. The CTC grade refers to the severity of the toxicity. For each specific toxicity, the CTCAE guidelines give a unique clinical description which corresponds to the degree of toxicity. You can find the CTCAE at the following page: [http://evs.nci.nih.gov/ftp1/CTCAE/CTCAE\\_4.03\\_2010-06-14\\_QuickReference\\_8.5x11.pdf](http://evs.nci.nih.gov/ftp1/CTCAE/CTCAE_4.03_2010-06-14_QuickReference_8.5x11.pdf). Always consult these guidelines to find the specific CTC grade for the toxicity to be reported.

The following symptoms are not required to report as toxicity:

- Symptoms that can be linked to (progress/relapse of) renal cell carcinoma.
- Symptoms that already existed in the same degree of seriousness at the time of diagnosis.
- Symptoms that can be regarded as symptoms of a previously reported other toxicity (e.g. swallowing difficulties due to mucositis).

Fever must be registered. Please also report whether fever is accompanied by neutropenia or not.

Note: If fever occurs as a result of a (allergic) reaction to the medication, the so-called "drug fever", this fever should also be reported as a toxicity.

|    | <b>Toxicity</b><br>If not specified by the physician, consult terminology used in the PDF file mentioned above | <b>CTC grade</b><br>If not specified by the physician, consult the guidelines in the PDF file mentioned above to find the specific CTC grade for the specific toxicity                                                                      | <b>Determined by</b>                                                                                                                                                                      | <b>Treatment to which the toxicity is related*</b>                   | <b>Start date of toxicity</b>           | <b>End date of toxicity</b>           | <b>Is toxicity treated?</b>                           |
|----|----------------------------------------------------------------------------------------------------------------|---------------------------------------------------------------------------------------------------------------------------------------------------------------------------------------------------------------------------------------------|-------------------------------------------------------------------------------------------------------------------------------------------------------------------------------------------|----------------------------------------------------------------------|-----------------------------------------|---------------------------------------|-------------------------------------------------------|
|    |                                                                                                                | <b>Grade 3:</b><br>Serious toxicity: influences general daily life activities, hospitalisation sometimes required<br><b>Grade 4:</b><br>Life-threatening toxicity: always requires hospitalization<br><b>Grade 5:</b> Death due to toxicity | Indicate whether the CTC grade was specified by the physician in the medical record of the patient, or whether the grade was interpreted by the data manager from the medical record (DM) | Report the treatment to which the toxicity is (very likely) related. | Note the date the toxicity has started. | Note the date the toxicity has ended. | Is the toxicity treated?                              |
| 1. | .....                                                                                                          | .....                                                                                                                                                                                                                                       | <input type="radio"/> physician<br><input type="radio"/> DM                                                                                                                               | .....                                                                | __-__-____                              | __-__-____                            | <input type="radio"/> no<br><input type="radio"/> yes |
| 2. | .....                                                                                                          | .....                                                                                                                                                                                                                                       | <input type="radio"/> physician<br><input type="radio"/> DM                                                                                                                               | .....                                                                | __-__-____                              | __-__-____                            | <input type="radio"/> no<br><input type="radio"/> yes |
| 3. | .....                                                                                                          | .....                                                                                                                                                                                                                                       | <input type="radio"/> physician<br><input type="radio"/> DM                                                                                                                               | .....                                                                | __-__-____                              | __-__-____                            | <input type="radio"/> no<br><input type="radio"/> yes |
| 4. | .....                                                                                                          | .....                                                                                                                                                                                                                                       | <input type="radio"/> physician<br><input type="radio"/> DM                                                                                                                               | .....                                                                | __-__-____                              | __-__-____                            | <input type="radio"/> no<br><input type="radio"/> yes |
| 5. | .....                                                                                                          | .....                                                                                                                                                                                                                                       | <input type="radio"/> physician<br><input type="radio"/> DM                                                                                                                               | .....                                                                | __-__-____                              | __-__-____                            | <input type="radio"/> no<br><input type="radio"/> yes |





## Response (also in case of non treatment)

Register the response as mentioned in the RADIOLOGY report; as a substitute use the response as indicated by the physician in the medical record.

Information on response is required, and therefore, this part should always be filled out. Details of tumor assessments (in the part 'tumor assessment': 'date tumor assessment', 'target lesions' and 'non-target lesions' below) should be registered if available.

More information on RECIST version 1.1: [www.eortc.be/recist/](http://www.eortc.be/recist/)

| Date of response assessment                                                                                                                                                                                                                                                                                                                                                                | Treatment line                                                                                                                           | Response*                                                                                                                                              | In case of PR or SD: Decrease according to RECIST | Date of relapse or progression                                                                                                                                                   | Further anti cancer treatment                                                                                                                                                                    | Reason no further treatment**                                                                                                                                                                              |
|--------------------------------------------------------------------------------------------------------------------------------------------------------------------------------------------------------------------------------------------------------------------------------------------------------------------------------------------------------------------------------------------|------------------------------------------------------------------------------------------------------------------------------------------|--------------------------------------------------------------------------------------------------------------------------------------------------------|---------------------------------------------------|----------------------------------------------------------------------------------------------------------------------------------------------------------------------------------|--------------------------------------------------------------------------------------------------------------------------------------------------------------------------------------------------|------------------------------------------------------------------------------------------------------------------------------------------------------------------------------------------------------------|
| Date on which the response has been established, within 3 months of treatment. This is the date that the physician recorded the response in the medical record. If this is not listed, then record the date of the investigations that are required for the determination of response. Please note the last date; therefore, the date on which all of the required results were available. | 1 = 1 <sup>st</sup> line<br>2 = 2 <sup>nd</sup> line<br>3 = 3 <sup>rd</sup> line<br>4 = 4 <sup>th</sup> line<br>5 = 5 <sup>th</sup> line | 0 = no (drug) treatment<br>1 = CR complete remission<br>2 = PR partial remission<br>3 = SD stable disease<br>4 = PD progressive disease<br>9 = unknown |                                                   | Date on which a possible relapse or progress occurs, mostly based on radiology. If no relapse or progress has occurred at end of follow-up, fill in 00-00-0000 (not applicable). | Indicate whether the patient receives active treatment as a result of relapse or progression of disease (or when a previous treatment was ineffective). 0= no (in case of best supportive care). | If a patient does not receive active treatment (anymore), register the reason why. Multiple reasons are possible. If the field code 88 is filled in, a specification must be given in the available field. |
| 1. ____ - ____ - ____                                                                                                                                                                                                                                                                                                                                                                      | .....                                                                                                                                    | .....                                                                                                                                                  | .....% ____ - ____ - ____                         | <input type="radio"/> no<br><input type="radio"/> yes                                                                                                                            | .....                                                                                                                                                                                            |                                                                                                                                                                                                            |
| 2. ____ - ____ - ____                                                                                                                                                                                                                                                                                                                                                                      | .....                                                                                                                                    | .....                                                                                                                                                  | .....% ____ - ____ - ____                         | <input type="radio"/> no<br><input type="radio"/> yes                                                                                                                            | .....                                                                                                                                                                                            |                                                                                                                                                                                                            |
| 3. ____ - ____ - ____                                                                                                                                                                                                                                                                                                                                                                      | .....                                                                                                                                    | .....                                                                                                                                                  | .....% ____ - ____ - ____                         | <input type="radio"/> no<br><input type="radio"/> yes                                                                                                                            | .....                                                                                                                                                                                            |                                                                                                                                                                                                            |
| 4. ____ - ____ - ____                                                                                                                                                                                                                                                                                                                                                                      | .....                                                                                                                                    | .....                                                                                                                                                  | .....% ____ - ____ - ____                         | <input type="radio"/> no<br><input type="radio"/> yes                                                                                                                            | .....                                                                                                                                                                                            |                                                                                                                                                                                                            |
| 5. ____ - ____ - ____                                                                                                                                                                                                                                                                                                                                                                      | .....                                                                                                                                    | .....                                                                                                                                                  | .....% ____ - ____ - ____                         | <input type="radio"/> no<br><input type="radio"/> yes                                                                                                                            | .....                                                                                                                                                                                            |                                                                                                                                                                                                            |
| 6. ____ - ____ - ____                                                                                                                                                                                                                                                                                                                                                                      | .....                                                                                                                                    | .....                                                                                                                                                  | .....% ____ - ____ - ____                         | <input type="radio"/> no<br><input type="radio"/> yes                                                                                                                            | .....                                                                                                                                                                                            |                                                                                                                                                                                                            |
| 7. ____ - ____ - ____                                                                                                                                                                                                                                                                                                                                                                      | .....                                                                                                                                    | .....                                                                                                                                                  | .....% ____ - ____ - ____                         | <input type="radio"/> no<br><input type="radio"/> yes                                                                                                                            | .....                                                                                                                                                                                            |                                                                                                                                                                                                            |
| 8. ____ - ____ - ____                                                                                                                                                                                                                                                                                                                                                                      | .....                                                                                                                                    | .....                                                                                                                                                  | .....% ____ - ____ - ____                         | <input type="radio"/> no<br><input type="radio"/> yes                                                                                                                            | .....                                                                                                                                                                                            |                                                                                                                                                                                                            |
| 9. ____ - ____ - ____                                                                                                                                                                                                                                                                                                                                                                      | .....                                                                                                                                    | .....                                                                                                                                                  | .....% ____ - ____ - ____                         | <input type="radio"/> no<br><input type="radio"/> yes                                                                                                                            | .....                                                                                                                                                                                            |                                                                                                                                                                                                            |
| 10. ____ - ____ - ____                                                                                                                                                                                                                                                                                                                                                                     | .....                                                                                                                                    | .....                                                                                                                                                  | .....% ____ - ____ - ____                         | <input type="radio"/> no<br><input type="radio"/> yes                                                                                                                            | .....                                                                                                                                                                                            |                                                                                                                                                                                                            |
| 11. ____ - ____ - ____                                                                                                                                                                                                                                                                                                                                                                     | .....                                                                                                                                    | .....                                                                                                                                                  | .....% ____ - ____ - ____                         | <input type="radio"/> no<br><input type="radio"/> yes                                                                                                                            | .....                                                                                                                                                                                            |                                                                                                                                                                                                            |



| Date of response assessment                                                                                                                                                                                                                                                                                                                                                                                                                                                                                                                                                                                                                                                                                                                                                                       | Treatment line | Response* | In case of PR or SD: Decrease according to RECIST | Date of relapse or progression                                                                                                                                                                                                                                                                                                                            | Further anti cancer treatment                         | Reason no further treatment** |
|---------------------------------------------------------------------------------------------------------------------------------------------------------------------------------------------------------------------------------------------------------------------------------------------------------------------------------------------------------------------------------------------------------------------------------------------------------------------------------------------------------------------------------------------------------------------------------------------------------------------------------------------------------------------------------------------------------------------------------------------------------------------------------------------------|----------------|-----------|---------------------------------------------------|-----------------------------------------------------------------------------------------------------------------------------------------------------------------------------------------------------------------------------------------------------------------------------------------------------------------------------------------------------------|-------------------------------------------------------|-------------------------------|
| 12. ____ - ____ - ____                                                                                                                                                                                                                                                                                                                                                                                                                                                                                                                                                                                                                                                                                                                                                                            | .....          | .....     | .....% ____ - ____ - ____                         |                                                                                                                                                                                                                                                                                                                                                           | <input type="radio"/> no<br><input type="radio"/> yes | .....                         |
| 13. ____ - ____ - ____                                                                                                                                                                                                                                                                                                                                                                                                                                                                                                                                                                                                                                                                                                                                                                            | .....          | .....     | .....% ____ - ____ - ____                         |                                                                                                                                                                                                                                                                                                                                                           | <input type="radio"/> no<br><input type="radio"/> yes | .....                         |
| 14. ____ - ____ - ____                                                                                                                                                                                                                                                                                                                                                                                                                                                                                                                                                                                                                                                                                                                                                                            | .....          | .....     | .....% ____ - ____ - ____                         |                                                                                                                                                                                                                                                                                                                                                           | <input type="radio"/> no<br><input type="radio"/> yes | .....                         |
| 15. ____ - ____ - ____                                                                                                                                                                                                                                                                                                                                                                                                                                                                                                                                                                                                                                                                                                                                                                            | .....          | .....     | .....% ____ - ____ - ____                         |                                                                                                                                                                                                                                                                                                                                                           | <input type="radio"/> no<br><input type="radio"/> yes | .....                         |
| 16. ____ - ____ - ____                                                                                                                                                                                                                                                                                                                                                                                                                                                                                                                                                                                                                                                                                                                                                                            | .....          | .....     | .....% ____ - ____ - ____                         |                                                                                                                                                                                                                                                                                                                                                           | <input type="radio"/> no<br><input type="radio"/> yes | .....                         |
| <b>* Response</b><br>0 = No (drug) treatment, adjuvant treatment or palliative treatment whereby the patient has died before the first evaluation time, therefore not applicable<br>1 = Complete remission (CR): Disappearance of all (target and non-target) lesions<br>2 = Partial remission (PR): At least 30% decrease in longest diameter (LD) of single tumor or sum of LDs of multiple masses (specify the decrease according to RECIST version 1.1)<br>3 = Stable disease (SD): Neither PR nor PD criteria met (specify the decrease (if any) according to RECIST version 1.1)<br>4 = Progressive disease (PD): Greater than 20% increase in LD of single tumor or the sum of LDs in multiple masses, or appearance of new lesions<br>9 = unknown (also when treatment was not completed) |                |           |                                                   | <b>** Reason no further treatment</b><br>00 = new treatment starts, so n.a.<br>01 = no further treatment possibilities<br>02 = wait-and-see policy<br>03 = refusal patient / family<br>04 = co morbidity<br>05 = functional status<br>06 = age<br>07 = short life expectancy<br>08 = patient has died<br>88 = other, please specify below<br>99 = unknown |                                                       |                               |
| Reason no further treatment, option 88, specification:                                                                                                                                                                                                                                                                                                                                                                                                                                                                                                                                                                                                                                                                                                                                            |                |           |                                                   |                                                                                                                                                                                                                                                                                                                                                           |                                                       |                               |
| .....                                                                                                                                                                                                                                                                                                                                                                                                                                                                                                                                                                                                                                                                                                                                                                                             |                |           |                                                   |                                                                                                                                                                                                                                                                                                                                                           |                                                       |                               |
| .....                                                                                                                                                                                                                                                                                                                                                                                                                                                                                                                                                                                                                                                                                                                                                                                             |                |           |                                                   |                                                                                                                                                                                                                                                                                                                                                           |                                                       |                               |
| .....                                                                                                                                                                                                                                                                                                                                                                                                                                                                                                                                                                                                                                                                                                                                                                                             |                |           |                                                   |                                                                                                                                                                                                                                                                                                                                                           |                                                       |                               |

## Tumor assessment (also in case of non treatment)

Details on 'tumor assessment', in the parts 'date tumor assessment', 'target lesions' and 'non-target lesions' should be filled out, if available. So please fill out the dates on which tumor assessments were performed in this treatment line and provide detailed information on target and non-target lesions. Click on the + buttons to add a new assessment.

### Date tumor assessment

|     |                     | Date                             |
|-----|---------------------|----------------------------------|
| 1.  | Baseline assessment | __ __ -- __ __ -- __ __ __ __ __ |
| 2.  | Tumor assessment 2  | __ __ -- __ __ -- __ __ __ __ __ |
| 3.  | Tumor assessment 3  | __ __ -- __ __ -- __ __ __ __ __ |
| 4.  | Tumor assessment 4  | __ __ -- __ __ -- __ __ __ __ __ |
| 5.  | Tumor assessment 5  | __ __ -- __ __ -- __ __ __ __ __ |
| 6.  | Tumor assessment 6  | __ __ -- __ __ -- __ __ __ __ __ |
| 7.  | Tumor assessment 7  | __ __ -- __ __ -- __ __ __ __ __ |
| 8.  | Tumor assessment 8  | __ __ -- __ __ -- __ __ __ __ __ |
| 9.  | Tumor assessment 9  | __ __ -- __ __ -- __ __ __ __ __ |
| 10. | Tumor assessment 10 | __ __ -- __ __ -- __ __ __ __ __ |
| 11. | Tumor assessment 11 | __ __ -- __ __ -- __ __ __ __ __ |
| 12. | Tumor assessment 12 | __ __ -- __ __ -- __ __ __ __ __ |
| 13. | Tumor assessment 13 | __ __ -- __ __ -- __ __ __ __ __ |
| 14. | Tumor assessment 14 | __ __ -- __ __ -- __ __ __ __ __ |
| 15. | Tumor assessment 15 | __ __ -- __ __ -- __ __ __ __ __ |
| 16. | Tumor assessment 16 | __ __ -- __ __ -- __ __ __ __ __ |

## Target Lesions

All measurable lesions up to a maximum of 5 lesions (2 per organ) representative of all involved organs should be identified as target lesions and be recorded and measured at baseline. These 5 lesions should be selected on the basis of their size (lesions with the longest diameter) and their suitability for accurate repetitive measurements (either by imaging techniques or clinically). A sum of the longest diameter (LD) for all target lesions will be calculated and reported as the baseline sum LD. The baseline sum LD will be used as reference to further characterize the objective tumor response of the measurable dimension of the disease. If there are >5 measurable lesions, those not selected as target lesions will be considered together with non-measurable disease as non-target lesions.

Kidney-ipsilateral = side of primary tumor

For lymph nodes: Take shortest diameter

|    | Location /type                                                                                | Target lesion 1                                                                                          | Target lesion 2                                                                                          | Target lesion 3                                                                                          | Target lesion 4                                                                                          | Target lesion 5                                                                                          | Sum of lesion diameters | Overall Response                                                                                                                  |
|----|-----------------------------------------------------------------------------------------------|----------------------------------------------------------------------------------------------------------|----------------------------------------------------------------------------------------------------------|----------------------------------------------------------------------------------------------------------|----------------------------------------------------------------------------------------------------------|----------------------------------------------------------------------------------------------------------|-------------------------|-----------------------------------------------------------------------------------------------------------------------------------|
| 1  | Location /type<br><br>ipsi = ipsilateral<br>con = contra-lateral<br>adrenal g = adrenal gland | Okidney ipsi<br>Okidney con<br>Olung<br>Olymphnode<br>Oliver<br>Obrain<br>Oadrenal g<br>Oother*<br>On.a. |                         | CR (complete remission)<br>PR (partial remission)<br>SD (stable disease)<br>PD (progressive disease)<br>U (unknown)               |
| 2  | Baseline assessment                                                                           | ..... mm                                                                                                 | ..... mm                | <input type="radio"/> CR <input type="radio"/> PD<br><input type="radio"/> PR <input type="radio"/> U<br><input type="radio"/> SD |
| 3  | Tumor 2 assessment                                                                            | ..... mm                                                                                                 | ..... mm                | <input type="radio"/> CR <input type="radio"/> PD<br><input type="radio"/> PR <input type="radio"/> U<br><input type="radio"/> SD |
| 4  | Tumor 3 assessment                                                                            | ..... mm                                                                                                 | ..... mm                | <input type="radio"/> CR <input type="radio"/> PD<br><input type="radio"/> PR <input type="radio"/> U<br><input type="radio"/> SD |
| 5  | Tumor 4 assessment                                                                            | ..... mm                                                                                                 | ..... mm                | <input type="radio"/> CR <input type="radio"/> PD<br><input type="radio"/> PR <input type="radio"/> U<br><input type="radio"/> SD |
| 6  | Tumor 5 assessment                                                                            | ..... mm                                                                                                 | ..... mm                | <input type="radio"/> CR <input type="radio"/> PD<br><input type="radio"/> PR <input type="radio"/> U<br><input type="radio"/> SD |
| 7  | Tumor 6 assessment                                                                            | ..... mm                                                                                                 | ..... mm                | <input type="radio"/> CR <input type="radio"/> PD<br><input type="radio"/> PR <input type="radio"/> U<br><input type="radio"/> SD |
| 8  | Tumor 7 assessment                                                                            | ..... mm                                                                                                 | ..... mm                | <input type="radio"/> CR <input type="radio"/> PD<br><input type="radio"/> PR <input type="radio"/> U<br><input type="radio"/> SD |
| 9  | Tumor 8 assessment                                                                            | ..... mm                                                                                                 | ..... mm                | <input type="radio"/> CR <input type="radio"/> PD<br><input type="radio"/> PR <input type="radio"/> U<br><input type="radio"/> SD |
| 10 | Tumor 9 assessment                                                                            | ..... mm                                                                                                 | ..... mm                | <input type="radio"/> CR <input type="radio"/> PD<br><input type="radio"/> PR <input type="radio"/> U<br><input type="radio"/> SD |
| 11 | Tumor 10 assessment                                                                           | ..... mm                                                                                                 | ..... mm                | <input type="radio"/> CR <input type="radio"/> PD<br><input type="radio"/> PR <input type="radio"/> U<br><input type="radio"/> SD |

|                         |                        |          |          |          |          |          |          |                                                                                                                                   |
|-------------------------|------------------------|----------|----------|----------|----------|----------|----------|-----------------------------------------------------------------------------------------------------------------------------------|
| 12                      | Tumor 11<br>assessment | ..... mm | <input type="radio"/> CR <input type="radio"/> PD<br><input type="radio"/> PR <input type="radio"/> U<br><input type="radio"/> SD |
| 13                      | Tumor 12<br>assessment | ..... mm | <input type="radio"/> CR <input type="radio"/> PD<br><input type="radio"/> PR <input type="radio"/> U<br><input type="radio"/> SD |
| 14                      | Tumor 13<br>assessment | ..... mm | <input type="radio"/> CR <input type="radio"/> PD<br><input type="radio"/> PR <input type="radio"/> U<br><input type="radio"/> SD |
| 15                      | Tumor 14<br>assessment | ..... mm | <input type="radio"/> CR <input type="radio"/> PD<br><input type="radio"/> PR <input type="radio"/> U<br><input type="radio"/> SD |
| 16                      | Tumor 15<br>assessment | ..... mm | <input type="radio"/> CR <input type="radio"/> PD<br><input type="radio"/> PR <input type="radio"/> U<br><input type="radio"/> SD |
| 17                      | Tumor 16<br>assessment | ..... mm | <input type="radio"/> CR <input type="radio"/> PD<br><input type="radio"/> PR <input type="radio"/> U<br><input type="radio"/> SD |
| *Target lesion<br>other |                        | .....    | .....    | .....    | .....    | .....    | .....    |                                                                                                                                   |

## Non-Target Lesions

All non-measurable lesions (or sites of disease) plus any measurable lesions over and above the 5 listed as target lesions. Measurements are not required but these lesions should be noted at baseline and should be followed as "equal", "increase" or "decrease".

|    | Location /type                                                                                   | Non-target lesion 1                                                                                                                                                                                                                                                                                                                     | Non-target lesion 2                                                                                                                                                                                                                                                                                                                     | Non-target lesion 3                                                                                                                                                                                                                                                                                                                     | Non-target lesion 4                                                                                                                                                                                                                                                                                                                     | Non-target lesion 5                                                                                                                                                                                                                                                                                                                     |
|----|--------------------------------------------------------------------------------------------------|-----------------------------------------------------------------------------------------------------------------------------------------------------------------------------------------------------------------------------------------------------------------------------------------------------------------------------------------|-----------------------------------------------------------------------------------------------------------------------------------------------------------------------------------------------------------------------------------------------------------------------------------------------------------------------------------------|-----------------------------------------------------------------------------------------------------------------------------------------------------------------------------------------------------------------------------------------------------------------------------------------------------------------------------------------|-----------------------------------------------------------------------------------------------------------------------------------------------------------------------------------------------------------------------------------------------------------------------------------------------------------------------------------------|-----------------------------------------------------------------------------------------------------------------------------------------------------------------------------------------------------------------------------------------------------------------------------------------------------------------------------------------|
| 1  | Location /type<br><br>ipsi = ipsilateral<br>contr = contra-lateral<br>adrenal gl = adrenal gland | <input type="radio"/> kidney ipsi<br><input type="radio"/> kidney contr<br><input type="radio"/> lung<br><input type="radio"/> lymphnodes<br><input type="radio"/> liver<br><input type="radio"/> bone<br><input type="radio"/> brain<br><input type="radio"/> adrenal gl<br><input type="radio"/> other*<br><input type="radio"/> n.a. | <input type="radio"/> kidney ipsi<br><input type="radio"/> kidney contr<br><input type="radio"/> lung<br><input type="radio"/> lymphnodes<br><input type="radio"/> liver<br><input type="radio"/> bone<br><input type="radio"/> brain<br><input type="radio"/> adrenal gl<br><input type="radio"/> other*<br><input type="radio"/> n.a. | <input type="radio"/> kidney ipsi<br><input type="radio"/> kidney contr<br><input type="radio"/> lung<br><input type="radio"/> lymphnodes<br><input type="radio"/> liver<br><input type="radio"/> bone<br><input type="radio"/> brain<br><input type="radio"/> adrenal gl<br><input type="radio"/> other*<br><input type="radio"/> n.a. | <input type="radio"/> kidney ipsi<br><input type="radio"/> kidney contr<br><input type="radio"/> lung<br><input type="radio"/> lymphnodes<br><input type="radio"/> liver<br><input type="radio"/> bone<br><input type="radio"/> brain<br><input type="radio"/> adrenal gl<br><input type="radio"/> other*<br><input type="radio"/> n.a. | <input type="radio"/> kidney ipsi<br><input type="radio"/> kidney contr<br><input type="radio"/> lung<br><input type="radio"/> lymphnodes<br><input type="radio"/> liver<br><input type="radio"/> bone<br><input type="radio"/> brain<br><input type="radio"/> adrenal gl<br><input type="radio"/> other*<br><input type="radio"/> n.a. |
| 2  | Baseline assessment                                                                              | <input type="radio"/> no<br><input type="radio"/> yes                                                                                                                                                                                                                                                                                   |
| 3  | Tumor 2 assessment                                                                               | <input type="radio"/> equal<br><input type="radio"/> increase<br><input type="radio"/> decrease                                                                                                                                                                                                                                         |
| 4  | Tumor 3 assessment                                                                               | <input type="radio"/> equal<br><input type="radio"/> increase<br><input type="radio"/> decrease                                                                                                                                                                                                                                         |
| 5  | Tumor 4 assessment                                                                               | <input type="radio"/> equal<br><input type="radio"/> increase<br><input type="radio"/> decrease                                                                                                                                                                                                                                         |
| 6  | Tumor 5 assessment                                                                               | <input type="radio"/> equal<br><input type="radio"/> increase<br><input type="radio"/> decrease                                                                                                                                                                                                                                         |
| 7  | Tumor 6 assessment                                                                               | <input type="radio"/> equal<br><input type="radio"/> increase<br><input type="radio"/> decrease                                                                                                                                                                                                                                         |
| 8  | Tumor 7 assessment                                                                               | <input type="radio"/> equal<br><input type="radio"/> increase<br><input type="radio"/> decrease                                                                                                                                                                                                                                         |
| 9  | Tumor 8 assessment                                                                               | <input type="radio"/> equal<br><input type="radio"/> increase<br><input type="radio"/> decrease                                                                                                                                                                                                                                         |
| 10 | Tumor 9 assessment                                                                               | <input type="radio"/> equal<br><input type="radio"/> increase<br><input type="radio"/> decrease                                                                                                                                                                                                                                         |
| 11 | Tumor 10 assessment                                                                              | <input type="radio"/> equal<br><input type="radio"/> increase<br><input type="radio"/> decrease                                                                                                                                                                                                                                         |
| 12 | Tumor 11 assessment                                                                              | <input type="radio"/> equal<br><input type="radio"/> increase<br><input type="radio"/> decrease                                                                                                                                                                                                                                         |

|                      | Location /type      | Non-target lesion 1                                                                             | Non-target lesion 2                                                                             | Non-target lesion 3                                                                             | Non-target lesion 4                                                                             | Non-target lesion 5                                                                             |
|----------------------|---------------------|-------------------------------------------------------------------------------------------------|-------------------------------------------------------------------------------------------------|-------------------------------------------------------------------------------------------------|-------------------------------------------------------------------------------------------------|-------------------------------------------------------------------------------------------------|
| 13                   | Tumor 12 assessment | <input type="radio"/> equal<br><input type="radio"/> increase<br><input type="radio"/> decrease |
| 14                   | Tumor 13 assessment | <input type="radio"/> equal<br><input type="radio"/> increase<br><input type="radio"/> decrease |
| 15                   | Tumor 14 assessment | <input type="radio"/> equal<br><input type="radio"/> increase<br><input type="radio"/> decrease |
| 16                   | Tumor 15 assessment | <input type="radio"/> equal<br><input type="radio"/> increase<br><input type="radio"/> decrease |
| 17                   | Tumor 16 assessment | <input type="radio"/> equal<br><input type="radio"/> increase<br><input type="radio"/> decrease |
| *Target lesion other |                     | .....                                                                                           | .....                                                                                           | .....                                                                                           | .....                                                                                           | .....                                                                                           |

| New Lesions                            |                                                       |
|----------------------------------------|-------------------------------------------------------|
| New lesion during this treatment line? | <input type="radio"/> no<br><input type="radio"/> yes |
| Date new lesion                        | __ __ __ __ __ __                                     |

## Final information on patient

## Final information on patient

This form should be filled in when a patient has died or is lost to follow up

|                                                                                      |                                                                                                                                                                                                                           |
|--------------------------------------------------------------------------------------|---------------------------------------------------------------------------------------------------------------------------------------------------------------------------------------------------------------------------|
| At which date has the final information (toxicities, treatment, etc.) been collected | __ __ -- __ __ -- __ __ __ __                                                                                                                                                                                             |
| Reason for last registration                                                         | <input type="radio"/> Lost to follow up (e.g., referral to another hospital, registration impossible)<br><input type="radio"/> Patient has died<br><input type="radio"/> Unknown                                          |
| In case the patient is lost to follow up, last date patient was known to be alive    | __ __ -- __ __ -- __ __ __ __                                                                                                                                                                                             |
| In case the patient has died, date of death                                          | __ __ -- __ __ -- __ __ __ __                                                                                                                                                                                             |
| In case the patient has died, cause of death                                         | <input type="radio"/> As a result of the malignancy<br><input type="radio"/> Due to toxicity (specify in "toxicities and response")<br><input type="radio"/> Other, please specify below<br><input type="radio"/> Unknown |
| Other cause of death, option 8                                                       | .....<br>.....<br>.....                                                                                                                                                                                                   |
| Remarks                                                                              | .....<br>.....<br>.....                                                                                                                                                                                                   |
