# Supplementary material for: Genome-Wide Meta-Analysis Identifies Variants in DSCAM and PDLIM3 That Correlate with Efficacy Outcomes in Metastatic Renal Cell Carcinoma Patients Treated with Sunitinib
Source: MDPI journal article supplement (doi:10.3390/cancers14122838), 2022-06-08
Supplement: s1 [file s1]

**Supplement 2: Linkage Disequilibrium (LD) with R<sup>2</sup> values for *DSCAM* gene variants.**

**Supplement 2a:** Overview of genetic variants in *DSCAM* that are in linkage disequilibrium with a R<sup>2</sup>>0.8. The values were obtained using the LD proxy tool from the LDlink website of the National Cancer Institute (<https://ldlink.nci.nih.gov/?tab=ldproxy>), in which SNP rs2205096 in *DSCAM* in the European population was entered.

| RS number  | Coord          | Alleles | MAF    | Distance | Dprime | R2     | Correlated_Alleles | RegulomeDB |
|------------|----------------|---------|--------|----------|--------|--------|--------------------|------------|
| rs2205096  | chr21:41683405 | (A/G)   | 0.0646 | 0        | 1.0    | 1.0    | A=A,G=G            | 7          |
| rs8126659  | chr21:41682972 | (C/T)   | 0.0636 | -433     | 1.0    | 0.9836 | A=C,G=T            | 6          |
| rs1554923  | chr21:41682817 | (C/A)   | 0.0636 | -588     | 1.0    | 0.9836 | A=C,G=A            | 7          |
| rs2205095  | chr21:41676786 | (T/A)   | 0.0616 | -6619    | 0.9828 | 0.9183 | A=T,G=A            | 6          |
| rs2837569  | chr21:41680306 | (G/T)   | 0.0596 | -3099    | 1.0    | 0.9182 | A=G,G=T            | 5          |
| rs1159719  | chr21:41670971 | (C/T)   | 0.0626 | -12434   | 0.9661 | 0.9026 | A=C,G=T            | 6          |
| rs61349484 | chr21:41668658 | (G/T)   | 0.0626 | -14747   | 0.9661 | 0.9026 | A=G,G=T            | 5          |
| rs73227032 | chr21:41673539 | (A/G)   | 0.0606 | -9866    | 0.9649 | 0.8701 | A=A,G=G            | 5          |
| rs68151839 | chr21:41673323 | (A/G)   | 0.0606 | -10082   | 0.9649 | 0.8701 | A=A,G=G            | 7          |
| rs66765790 | chr21:41673200 | (G/C)   | 0.0606 | -10205   | 0.9649 | 0.8701 | A=G,G=C            | 7          |
| rs2837565  | chr21:41672532 | (T/C)   | 0.0606 | -10873   | 0.9649 | 0.8701 | A=T,G=C            | 4          |
| rs2837564  | chr21:41672173 | (T/C)   | 0.0606 | -11232   | 0.9649 | 0.8701 | A=T,G=C            | 6          |
| rs2837563  | chr21:41671977 | (T/A)   | 0.0606 | -11428   | 0.9649 | 0.8701 | A=T,G=A            | 6          |
| rs2837562  | chr21:41671906 | (C/G)   | 0.0606 | -11499   | 0.9649 | 0.8701 | A=C,G=G            | 7          |
| rs2837561  | chr21:41671704 | (A/T)   | 0.0606 | -11701   | 0.9649 | 0.8701 | A=A,G=T            | 6          |
| rs7282745  | chr21:41671653 | (T/G)   | 0.0606 | -11752   | 0.9649 | 0.8701 | A=T,G=G            | 6          |
| rs2837560  | chr21:41671275 | (G/A)   | 0.0606 | -12130   | 0.9649 | 0.8701 | A=G,G=A            | 7          |
| rs2837559  | chr21:41671015 | (C/T)   | 0.0606 | -12390   | 0.9649 | 0.8701 | A=C,G=T            | 7          |
| rs2837558  | chr21:41670535 | (T/C)   | 0.0606 | -12870   | 0.9649 | 0.8701 | A=T,G=C            | 7          |
| rs2837557  | chr21:41670497 | (A/G)   | 0.0606 | -12908   | 0.9649 | 0.8701 | A=A,G=G            | 6          |
| rs2837556  | chr21:41670440 | (G/C)   | 0.0606 | -12965   | 0.9649 | 0.8701 | A=G,G=C            | 7          |
| rs7276530  | chr21:41670422 | (G/A)   | 0.0606 | -12983   | 0.9649 | 0.8701 | A=G,G=A            | 7          |
| rs7276117  | chr21:41670303 | (C/T)   | 0.0606 | -13102   | 0.9649 | 0.8701 | A=C,G=T            | 6          |
| rs7277178  | chr21:41670289 | (T/G)   | 0.0606 | -13116   | 0.9649 | 0.8701 | A=T,G=G            | 7          |
| rs7282179  | chr21:41670052 | (T/C)   | 0.0606 | -13353   | 0.9649 | 0.8701 | A=T,G=C            | 7          |
| rs7278717  | chr21:41674286 | (G/C)   | 0.0616 | -9119    | 0.9483 | 0.855  | A=G,G=C            | 6          |
| rs714983   | chr21:41674094 | (T/G)   | 0.0616 | -9311    | 0.9483 | 0.855  | A=T,G=G            | 5          |
| rs1537110  | chr21:41672463 | (C/G)   | 0.0616 | -10942   | 0.9483 | 0.855  | A=C,G=G            | 4          |
| rs8128963  | chr21:41672394 | (G/A)   | 0.0616 | -11011   | 0.9483 | 0.855  | A=G,G=A            | 4          |

|             |                |       |        |       |        |        |         |   |
|-------------|----------------|-------|--------|-------|--------|--------|---------|---|
| rs2837566   | chr21:41673535 | (G/A) | 0.0626 | -9870 | 0.9321 | 0.8403 | A=G,G=A | 5 |
| rs714982    | chr21:41674108 | (T/G) | 0.0606 | -9297 | 0.9474 | 0.8388 | A=T,G=G | 5 |
| rs150942709 | chr21:41678694 | (A/C) | 0.0765 | -4711 | 1.0    | 0.8334 | A=A,G=C | 7 |
| rs57108956  | chr21:41674465 | (A/G) | 0.0765 | -8940 | 1.0    | 0.8334 | A=A,G=G | 5 |

**Supplement 2b:** Overview of genetic variants in DSCAM that are in linkage disequilibrium with a  $R^2 > 0.8$ . The values were obtained using HaploReg version 4.1 (<http://pubs.broadinstitute.org/mammals/haploreg/haploreg.php>) from Massachusetts Institute of Technology (MIT), in which SNP rs2205096 in *DSCAM* in the European population was entered.

| chr | pos (hg38) | LD (r <sup>2</sup> ) | LD (D') | variant    | Ref | Alt | AFR freq | AMR freq | ASN freq | EUR freq | DNase           | Proteins bound | Motifs changed              | GENCODE genes | dbSNP func annot |
|-----|------------|----------------------|---------|------------|-----|-----|----------|----------|----------|----------|-----------------|----------------|-----------------------------|---------------|------------------|
| 21  | 40296731   | 0.82                 | 0.93    | rs61349484 | G   | T   | 0.57     | 0.16     | 0.34     | 0.06     |                 |                | 6 altered motifs            | DSCAM         | intronic         |
| 21  | 40298125   | 0.84                 | 0.97    | rs7282179  | T   | C   | 0.45     | 0.15     | 0.37     | 0.05     |                 |                | Lmo2-complex, RFX5, TCF12   | DSCAM         | intronic         |
| 21  | 40298376   | 0.84                 | 0.97    | rs7276117  | C   | T   | 0.45     | 0.15     | 0.37     | 0.05     |                 |                | Mtf1, Myc, p53              | DSCAM         | intronic         |
| 21  | 40298495   | 0.84                 | 0.97    | rs7276530  | G   | A   | 0.45     | 0.15     | 0.37     | 0.05     |                 |                | Pou1f1                      | DSCAM         | intronic         |
| 21  | 40298513   | 0.84                 | 0.97    | rs2837556  | G   | C   | 0.45     | 0.15     | 0.37     | 0.05     |                 |                | CEBPG                       | DSCAM         | intronic         |
| 21  | 40298570   | 0.84                 | 0.97    | rs2837557  | A   | G   | 0.45     | 0.15     | 0.37     | 0.05     |                 |                | AP-1, CACD, CEBPD           | DSCAM         | intronic         |
| 21  | 40298608   | 0.84                 | 0.97    | rs2837558  | T   | C   | 0.45     | 0.15     | 0.37     | 0.05     |                 |                | Foxj1, Otx2                 | DSCAM         | intronic         |
| 21  | 40299044   | 0.86                 | 0.97    | rs1159719  | C   | T   | 0.49     | 0.16     | 0.37     | 0.05     |                 |                | Ik-1, NF-kappaB, RBP-Jkappa | DSCAM         | intronic         |
| 21  | 40299088   | 0.84                 | 0.97    | rs2837559  | C   | T   | 0.45     | 0.15     | 0.37     | 0.05     |                 |                | Gfi1, Gfi1b                 | DSCAM         | intronic         |
| 21  | 40299348   | 0.84                 | 0.97    | rs2837560  | G   | A   | 0.46     | 0.15     | 0.37     | 0.05     |                 |                | 7 altered motifs            | DSCAM         | intronic         |
| 21  | 40299726   | 0.84                 | 0.97    | rs7282745  | T   | G   | 0.46     | 0.15     | 0.37     | 0.05     | MUS             |                | 4 altered motifs            | DSCAM         | intronic         |
| 21  | 40299777   | 0.84                 | 0.97    | rs2837561  | A   | T   | 0.45     | 0.15     | 0.37     | 0.05     | MUS             |                | TCF4                        | DSCAM         | intronic         |
| 21  | 40299979   | 0.84                 | 0.97    | rs2837562  | C   | G   | 0.46     | 0.15     | 0.37     | 0.05     | MUS             |                | Nkx2                        | DSCAM         | intronic         |
| 21  | 40300050   | 0.84                 | 0.97    | rs2837563  | T   | A   | 0.45     | 0.15     | 0.37     | 0.05     |                 |                | CEBPG                       | DSCAM         | intronic         |
| 21  | 40300246   | 0.84                 | 0.97    | rs2837564  | T   | C   | 0.43     | 0.15     | 0.37     | 0.05     |                 |                | GCNF, Nr2e3, YY1            | DSCAM         | intronic         |
| 21  | 40300467   | 0.84                 | 0.97    | rs8128963  | G   | A   | 0.46     | 0.15     | 0.37     | 0.05     | ESDR, ESDR, HRT | NRSF           | HES1                        | DSCAM         | intronic         |
| 21  | 40300536   | 0.84                 | 0.97    | rs1537110  | C   | G   | 0.46     | 0.15     | 0.37     | 0.05     | ESDR, ESC       | NRSF           | CCNT2, MAZR                 | DSCAM         | intronic         |

|    |          |      |      |             |   |   |      |      |      |      |      |               |                       |       |          |
|----|----------|------|------|-------------|---|---|------|------|------|------|------|---------------|-----------------------|-------|----------|
| 21 | 40300605 | 0.84 | 0.97 | rs2837565   | T | C | 0.46 | 0.15 | 0.37 | 0.05 |      | NRSF,CTC<br>F | 4 altered motifs      | DSCAM | intronic |
| 21 | 40301273 | 0.84 | 0.97 | rs66765790  | G | C | 0.46 | 0.15 | 0.37 | 0.05 |      |               | Pou2f2,Zfp410         | DSCAM | intronic |
| 21 | 40301396 | 0.84 | 0.97 | rs68151839  | A | G | 0.46 | 0.15 | 0.37 | 0.05 |      |               | BDP1                  | DSCAM | intronic |
| 21 | 40301753 | 0.81 | 0.97 | rs67162236  | C | T | 0.16 | 0.07 | 0.13 | 0.05 | SKIN |               | DMRT1                 | DSCAM | intronic |
| 21 | 40302167 | 0.93 | 0.98 | rs714983    | T | G | 0.34 | 0.14 | 0.37 | 0.06 |      |               | 7 altered motifs      | DSCAM | intronic |
| 21 | 40302181 | 0.93 | 0.98 | rs714982    | T | G | 0.34 | 0.14 | 0.37 | 0.06 |      |               |                       | DSCAM | intronic |
| 21 | 40302359 | 0.93 | 0.98 | rs7278717   | G | C | 0.34 | 0.14 | 0.37 | 0.06 | SKIN |               | BCL,NF-kappaB         | DSCAM | intronic |
| 21 | 40302887 | 0.86 | 0.97 | rs2837567   | C | T | 0.31 | 0.13 | 0.37 | 0.05 |      |               | 13 altered<br>motifs  | DSCAM | intronic |
| 21 | 40304859 | 0.82 | 0.93 | rs2205095   | T | A | 0.41 | 0.15 | 0.37 | 0.06 |      |               | Dlx2,Osr,Sox          | DSCAM | intronic |
| 21 | 40307547 | 0.82 | 0.98 | rs4411799   | T | C | 0.54 | 0.16 | 0.37 | 0.07 |      |               | Ets,Zbtb12            | DSCAM | intronic |
| 21 | 40307920 | 0.81 | 1    | rs113168647 | C | T | 0.04 | 0.07 | 0.12 | 0.05 |      |               | EBF,Myb               | DSCAM | intronic |
| 21 | 40308379 | 0.88 | 1    | rs2837569   | G | T | 0.51 | 0.17 | 0.37 | 0.05 | HRT  |               | Egr-1,Gfi1,Hsf        | DSCAM | intronic |
| 21 | 40310890 | 0.98 | 1    | rs1554923   | C | A | 0.52 | 0.17 | 0.37 | 0.06 |      |               |                       | DSCAM | intronic |
| 21 | 40311045 | 0.98 | 1    | rs8126659   | C | T | 0.51 | 0.17 | 0.36 | 0.06 |      |               | LBP-<br>1,Nanog,TCF12 | DSCAM | intronic |
| 21 | 40311478 | 1    | 1    | rs2205096   | A | G | 0.51 | 0.17 | 0.37 | 0.06 |      |               |                       | DSCAM | intronic |
