# Supplementary material for: Genome-Wide Meta-Analysis Identifies Variants in DSCAM and PDLIM3 That Correlate with Efficacy Outcomes in Metastatic Renal Cell Carcinoma Patients Treated with Sunitinib
Source: Cancers (Basel). 2022 Jun 8;14(12):2838. doi: 10.3390/cancers14122838 (PMC9220885; doi:10.3390/cancers14122838)
Supplement: Supplementary file 1 [file cancers-14-02838-s001.zip]

Archive with 4 entries (4 files):
- Supplementary Figures and Tables.pdf
- Supplementary File S1a.pdf
- Supplementary File S1b.pdf
- Supplementary File S2.pdf
